# Supplementary material for: Incident glaucoma and ocular hypertension after periocular and intravitreal steroid injections: a claims-based analysis
Source: HighWire-hosted journal article supplement (doi:10.1136/bmjophth-2023-001508), 2023-12-01
Supplement: bmjophth-2023-001508supp001_data_supplement.pdf [file bmjophth-2023-001508supp001_data_supplement.pdf]

**Supplemental Table 1.** List of diagnosis, medication, and procedure codes used to determine patient clinical characteristics from the SOURCE data repository. (CPT = Current Procedural Terminology; HCPCS = Healthcare Common Procedure Coding System; ICD9 = International Classification of Diseases, 9<sup>th</sup> revision; ICD10 = International Classification of Diseases, 10<sup>th</sup> revision; IOP = intraocular pressure; MIGS = minimally invasive glaucoma surgery; NDC = National Drug Codes; OHT = ocular hypertension)

| Category (Code type)                                    | Variable                               | Code numbers                                                                                                       |
|---------------------------------------------------------|----------------------------------------|--------------------------------------------------------------------------------------------------------------------|
| Glaucoma or OHT diagnosis (ICD9, ICD10)                 | Steroid response glaucoma              | ICD9: 365.03, 365.31, 365.32<br>ICD10: H40.04x                                                                     |
|                                                         | Ocular hypertension                    | ICD9: 365.04<br>ICD10: H40.05x                                                                                     |
|                                                         | Open-angle glaucoma                    | ICD9: 365.00, 365.01, 365.05, 365.10, 365.11, 365.12, 365.15<br>ICD10: H40.01x, H40.02x, H40.11x, H40.12x, H40.15x |
| Risk factors for glaucoma or OHT (ICD9, ICD10; CPT)     | Type 1 diabetes mellitus               | ICD9: 250.01<br>ICD10: E10.9                                                                                       |
|                                                         | Connective tissue disease              | ICD9: 710.x, 714.x<br>ICD10: L94.x, M05.x, M06.x, M30.x, M31.x, M32.x, M33.x, M34.x, M35.x, M36.x                  |
|                                                         | High myopia                            | ICD9: 360.21<br>ICD10: H44.2x                                                                                      |
|                                                         | History of penetrating keratoplasty    | CPT: 65730, 65750, 65755                                                                                           |
| Indications for ocular steroid injections (ICD9, ICD10) | Scleritis                              | ICD9: 379.0x<br>ICD10: H15.0x                                                                                      |
|                                                         | Anterior uveitis                       | ICD9: 364.x, 054.44, 053.22<br>ICD10: H20.x, A18.54, B00.51, B02.32                                                |
|                                                         | Intermediate and posterior uveitis     | ICD9: 363.x<br>ICD10: H30.x, H43.89                                                                                |
|                                                         | Panuveitis                             | ICD9: 360.12<br>ICD10: H44.x                                                                                       |
|                                                         | Diabetic retinopathy (type 1 diabetes) | ICD10: E10.3x                                                                                                      |

|                          |                                        |                                                                                                                                                                                                                                                                                                                                                                                                                                                                                                                                                                                                                                                                    |
|--------------------------|----------------------------------------|--------------------------------------------------------------------------------------------------------------------------------------------------------------------------------------------------------------------------------------------------------------------------------------------------------------------------------------------------------------------------------------------------------------------------------------------------------------------------------------------------------------------------------------------------------------------------------------------------------------------------------------------------------------------|
|                          | Diabetic retinopathy (type 2 diabetes) | ICD10: E11.3x                                                                                                                                                                                                                                                                                                                                                                                                                                                                                                                                                                                                                                                      |
|                          | Unspecified diabetic retinopathy       | ICD9: 362.07<br>ICD10: E13.3x                                                                                                                                                                                                                                                                                                                                                                                                                                                                                                                                                                                                                                      |
|                          | Cystoid macular edema                  | ICD9: 362.53<br>ICD10: H59.03x, H35.35x                                                                                                                                                                                                                                                                                                                                                                                                                                                                                                                                                                                                                            |
|                          | Central retinal vein occlusion         | ICD9: 362.35<br>ICD10: H34.81x                                                                                                                                                                                                                                                                                                                                                                                                                                                                                                                                                                                                                                     |
|                          | Branch retinal vein occlusion          | ICD9: 362.36<br>ICD10: H34.83x                                                                                                                                                                                                                                                                                                                                                                                                                                                                                                                                                                                                                                     |
|                          | Age-related macular degeneration       | ICD9: 362.50, 362.51, 362.52<br>ICD10: H35.31x, H35.32x                                                                                                                                                                                                                                                                                                                                                                                                                                                                                                                                                                                                            |
| IOP-lowering drops (NDC) | Alpha agonists                         | 0023-9177-05, 0023-9177-10, 0023-9177-15, 0023-9321-03, 0023-9321-05, 0023-9321-10, 0023-9321-15, 0065-0660-10, 0299-5980-00, 0299-5980-02, 0299-5980-30, 0299-5980-35, 0299-5980-45, 14445-400-05, 14445-400-10, 14445-400-15, 17478-715-10, 17478-715-11, 17478-715-12, 17478-716-10, 17478-716-11, 24208-411-05, 24208-411-10, 24208-411-15, 50090-1046-0, 50090-1800-0, 50090-4224-0, 61314-143-05, 61314-143-10, 61314-143-15, 61314-144-05, 61314-144-10, 61314-144-15, 61314-665-05, 61314-665-10, 70069-231-01, 70069-232-01, 70069-233-01, 0023-9211-03, 0023-9211-05, 0023-9211-10, 0023-9211-15, 0065-4147-25, 0065-4147-27, 0078-0904-38, 0078-0904-98 |

## Beta blockers

0023-9211-03, 0023-9211-05, 0023-9211-10,  
0023-9211-15, 0065-0246-10, 0065-0246-15,  
0187-1496-05, 0187-1496-99, 0187-1498-25,  
0378-0055-01, 0378-0221-01, 0378-0715-01,  
10702-013-01, 10702-014-01, 13811-618-10,  
13811-620-10, 17478-189-24, 17478-288-10,  
17478-288-11, 17478-288-12, 17478-288-25,  
17478-289-10, 17478-289-11, 17478-289-12,  
17478-289-25, 17478-365-05, 17478-366-05,  
17478-366-10, 17478-366-15, 17478-705-10,  
17478-705-11, 17478-705-12, 17478-705-25,  
24208-004-01, 24208-004-02, 24208-004-03,  
24208-812-05, 24208-813-05, 24208-813-10,  
24208-814-25, 24208-816-05, 24208-818-25,  
24208-819-05, 24658-700-01, 24658-701-01,  
42806-038-01, 42806-038-10, 42806-039-01,  
42806-039-10, 45865-121-01, 50090-0558-0,  
50090-3441-0, 50090-5091-0, 50383-021-05,  
50383-021-10, 50383-021-15, 60429-753-01,  
60429-754-01, 60505-1005-1, 60505-1005-4,  
60758-801-05, 60758-801-10, 60758-802-05,  
60758-802-10, 61314-224-05, 61314-224-25,  
61314-225-05, 61314-225-25, 61314-226-05,  
61314-226-10, 61314-226-15, 61314-227-05,  
61314-227-10, 61314-227-15, 61314-245-01,  
61314-245-02, 61314-245-03, 62332-545-05,  
62332-546-05, 63629-7167-1, 63629-7167-2,  
63629-7167-3, 63629-7167-4, 64980-513-01,  
64980-513-05, 64980-513-15, 64980-514-01,  
64980-514-05, 64980-514-15, 67877-229-11,  
67877-229-15, 67877-229-55, 68682-045-25,  
68682-045-50, 68682-812-05, 68682-813-05,  
68682-813-10, 70518-2353-0, 76478-001-05,  
76478-001-10, 76478-001-15, 76478-002-05,  
76478-002-10, 76478-002-12, 76478-002-15,  
76519-1163-0, 0527-1763-73, 17478-514-11,  
17478-604-15, 17478-604-30, 17478-604-90,  
17478-605-10, 24208-486-05, 24208-486-10,  
42571-147-26, 50090-1247-0, 50383-233-05,  
50383-233-10, 50383-261-61, 50383-261-91,  
60429-115-10, 61314-030-01, 61314-030-02,  
65862-947-18, 65862-947-60, 69315-305-05,  
69315-305-10, 70069-051-12

|                               |                                                                                                                                                                                                                                                                                                                                                                                                                                                                                                                                                                                                                                                                                                                                                                                                                                                                                                                                                                                                                                  |
|-------------------------------|----------------------------------------------------------------------------------------------------------------------------------------------------------------------------------------------------------------------------------------------------------------------------------------------------------------------------------------------------------------------------------------------------------------------------------------------------------------------------------------------------------------------------------------------------------------------------------------------------------------------------------------------------------------------------------------------------------------------------------------------------------------------------------------------------------------------------------------------------------------------------------------------------------------------------------------------------------------------------------------------------------------------------------|
| Carbonic anhydrase inhibitors | 0006-3519-36, 0065-0275-10, 0065-0275-15, 0065-0275-25, 0998-0203-15, 0998-0204-15, 0998-0206-15, 17478-223-12, 17478-224-12, 17478-226-12, 24208-485-10, 42571-141-26, 50090-1246-0, 50090-5280-0, 50383-232-05, 50383-232-10, 60219-1745-8, 60219-1746-8, 60219-1747-8, 60429-114-10, 61314-019-10, 61314-203-15, 61314-204-15, 61314-206-15, 62332-519-10, 69238-1745-8, 69238-1746-8, 69238-1747-8, 69315-304-05, 69315-304-10, 70069-181-01, 70069-191-01, 70069-201-01, 0527-1763-73, 17478-514-11, 17478-604-15, 17478-604-30, 17478-604-90, 17478-605-10, 24208-486-05, 24208-486-10, 42571-147-26, 50090-1247-0, 50383-233-05, 50383-233-10, 50383-261-61, 50383-261-91, 60429-115-10, 61314-030-01, 61314-030-02, 65862-947-18, 65862-947-60, 69315-305-05, 69315-305-10, 70069-051-12, 0065-4147-25, 0065-4147-27, 0078-0904-38, 0078-0904-98                                                                                                                                                                         |
| Prostaglandin analogues       | 0013-8303-04, 0023-3205-02, 0023-3205-03, 0023-3205-05, 0023-3205-08, 0065-0260-02, 0065-0260-05, 0065-0260-25, 0078-0946-25, 0078-0946-40, 0078-0946-98, 0378-9651-32, 0378-9651-50, 0781-6185-56, 0781-6185-75, 0781-6206-75, 0781-6206-93, 13985-610-02, 17478-609-10, 17478-609-30, 17478-609-90, 17478-625-12, 24208-463-25, 47335-317-90, 47335-317-92, 47335-317-94, 47335-317-98, 50383-908-02, 50383-908-05, 50383-908-07, 50383-912-03, 50383-912-05, 59762-0333-2, 60505-0583-1, 60505-0583-4, 60505-0583-5, 60505-0593-1, 60505-0593-4, 61314-547-01, 61314-547-03, 61919-112-25, 62332-507-05, 62332-507-25, 62332-510-05, 62332-510-25, 62332-511-03, 62332-511-05, 64980-516-25, 65862-872-25, 68071-4612-2, 68071-4650-2, 68071-4893-2, 68083-295-01, 68083-296-01, 68180-429-01, 68180-429-02, 68180-429-03, 70069-401-01, 70069-402-01, 70069-403-01, 70069-421-01, 70069-421-03, 71205-154-25, 72266-139-01, 72266-140-01, 24208-504-01, 24208-504-02, 24208-504-05, 24208-504-06, 70727-529-25, 70727-529-99 |
| Nitric oxide donators         | 24208-504-01, 24208-504-02, 24208-504-05, 24208-504-06                                                                                                                                                                                                                                                                                                                                                                                                                                                                                                                                                                                                                                                                                                                                                                                                                                                                                                                                                                           |
| Rho kinase inhibitors         | 70727-497-25, 70727-497-99, 70727-529-25, 70727-529-99                                                                                                                                                                                                                                                                                                                                                                                                                                                                                                                                                                                                                                                                                                                                                                                                                                                                                                                                                                           |

---

|                                               |                                     |                                                                                       |
|-----------------------------------------------|-------------------------------------|---------------------------------------------------------------------------------------|
| Glaucoma surgeries and laser procedures (CPT) | Incisional glaucoma shunt surgery   | 1261, 1264, 1265, 1267, C1783, L8612, 66160, 66170, 66172, 66179, 66180, 66184, 66185 |
|                                               | MIGS drainage devices               | 0191T, 0253T, 0376T, 0449T, 0450T, 0474T, 66183, 66989, 66991                         |
|                                               | Other MIGS without drainage devices | 65820, 65850, 66174, 66175                                                            |
|                                               | Laser glaucoma procedures           | 65855, 66710, 66711                                                                   |
| Type of steroid injection (HCPCS)             | Triamcinolone                       | J3300, J3301                                                                          |
|                                               | Dexamethasone                       | J7312                                                                                 |
|                                               | Fluocinolone                        | J7311, J7313                                                                          |
| Location of steroid injection (CPT)           | Subconjunctival                     | 68200                                                                                 |
|                                               | Retrobulbar (including sub-Tenons)  | 67515, 67500                                                                          |
|                                               | Intravitreal                        | 67027, 67028                                                                          |
